# Supplementary material for: Development of Resilience Framework and Respective Tool for Urban Stormwater Services
Source: MDPI journal article supplement (doi:10.3390/su16031316), 2024-02-04
Supplement: s1 [file s1]

**Table S1.** Strategic Dimension objectives, criteria, and metrics.

|                  |                                                                                                                                   |             |
|------------------|-----------------------------------------------------------------------------------------------------------------------------------|-------------|
| <b>Objective</b> | <b>S1 - Institutional capacity</b>                                                                                                |             |
| <b>Criteria</b>  | <b>S1.1 - Resilience planning and policies</b>                                                                                    | Answer rate |
| <b>Metric</b>    | <b>S1.1.1 - Stormwater Strategic Plan</b>                                                                                         |             |
| Source           | Adapted from RESCCUE RAF [28]                                                                                                     |             |
| Answer type      | Single choice <sup>1</sup>                                                                                                        |             |
| Question         | Does the service have an implemented Drainage/Stormwater Plan with adequate monitoring and review?                                |             |
|                  | 1) The strategic plan does not exist.                                                                                             | 0.00        |
|                  | 2) The strategic plan exists but is not implemented (outdated/unmonitored).                                                       | 0.33        |
|                  | 3) The strategic plan is implemented but considers only a technical component.                                                    | 0.67        |
|                  | 4) The strategic plan is implemented and considers technical and non-technical components.                                        | 1.00        |
| <b>Metric</b>    | <b>S1.1.2 - Plan alignment with the City Master Plan</b>                                                                          |             |
| Source           | Adapted from RESCCUE RAF [28]                                                                                                     |             |
| Answer type      | Single choice                                                                                                                     |             |
| Question         | Is the plan aligned and complying with the City Master Plan?                                                                      |             |
|                  | 1) No.                                                                                                                            | 0.00        |
|                  | 2) Partially.                                                                                                                     | 0.50        |
|                  | 3) Yes.                                                                                                                           | 1.00        |
| <b>Metric</b>    | <b>S1.1.3 - Plan alignment with Resilience system-thinking</b>                                                                    |             |
| Source           | -                                                                                                                                 |             |
| Answer type      | Single choice                                                                                                                     |             |
| Question         | Does the plan have an explicit resilience-oriented view?                                                                          |             |
|                  | 1) No.                                                                                                                            | 0.00        |
|                  | 2) Partially or indirectly.                                                                                                       | 0.50        |
|                  | 3) Yes.                                                                                                                           | 1.00        |
| <b>Criteria</b>  | <b>S1.2 - Service system thinking</b>                                                                                             |             |
| <b>Metric</b>    | <b>S1.2.1 - Service management inclusion in city planning and strategic involvement</b>                                           |             |
| Source           | -                                                                                                                                 |             |
| Answer type      | Single choice                                                                                                                     |             |
| Question         | Is the stormwater service included in the city's strategic planning?                                                              |             |
|                  | 1) No strategic involvement.                                                                                                      | 0.00        |
|                  | 2) Yes, but indirectly, marginally, or sporadically.                                                                              | 0.50        |
|                  | 3) Yes.                                                                                                                           | 1.00        |
| <b>Metric</b>    | <b>S1.2.2 - Knowledge exchange with other urban services</b>                                                                      |             |
| Source           | Adapted from RESCCUE RAF [28]                                                                                                     |             |
| Answer type      | Single choice                                                                                                                     |             |
| Question         | Does the service have knowledge exchange procedures with other urban services (partnerships, participation in conferences, etc.)? |             |
|                  | 1) No explicit knowledge exchange procedures are in place.                                                                        | 0.00        |
|                  | 2) Yes, but informally or unofficially.                                                                                           | 0.50        |
|                  | 3) Yes.                                                                                                                           | 1.00        |

|                  |                                                                                      |  |      |
|------------------|--------------------------------------------------------------------------------------|--|------|
| <b>Metric</b>    | <b>S1.2.3 - Service involvement in R&amp;D activities</b>                            |  |      |
| Source           | -                                                                                    |  |      |
| Answer type      | Single choice                                                                        |  |      |
| Question         | Is the service involved in R&D or other innovation activities or projects?           |  |      |
|                  | 1) No involvement in the last 5 years.                                               |  | 0.00 |
|                  | 2) Yes, in the last 5 years, but not at the moment.                                  |  | 0.50 |
|                  | 3) Yes, at the moment or up to the next 5 years.                                     |  | 1.00 |
| <b>Metric</b>    | <b>S1.2.4 - Service contribution to societal change</b>                              |  |      |
| Source           | -                                                                                    |  |      |
| Answer type      | Single choice                                                                        |  |      |
| Question         | Does the service provide opportunities for public engagement and participation?      |  |      |
|                  | 1) Not explicitly.                                                                   |  | 0.00 |
|                  | 2) Only when mandatory.                                                              |  | 0.50 |
|                  | 3) Yes, regularly.                                                                   |  | 1.00 |
| <b>Objective</b> | <b>S2 - Urban service relationships</b>                                              |  |      |
| <b>Criteria</b>  | <b>S2.1 - Interdependencies</b>                                                      |  |      |
| <b>Metric</b>    | <b>S2.1.1 - Stormwater service dependencies on other urban services</b>              |  |      |
| Source           | Adapted from RESCCUE RAF [28]                                                        |  |      |
| Answer type      | Single choice                                                                        |  |      |
| Question         | To what extent are dependencies on other services known?                             |  |      |
|                  | 1) No knowledge or formal understanding of dependencies.                             |  | 0.00 |
|                  | 2) Minor understanding of dependencies.                                              |  | 0.33 |
|                  | 3) Critical dependencies are known.                                                  |  | 0.67 |
|                  | 4) The entire map of dependencies is depicted.                                       |  | 1.00 |
| <b>Metric</b>    | <b>S2.1.2 - Urban services dependencies on Stormwater service</b>                    |  |      |
| Source           | Adapted from RAF RESCCUE [28]                                                        |  |      |
| Answer type      | Single choice                                                                        |  |      |
| Question         | To what extent are dependencies from other services known?                           |  |      |
|                  | 1) No knowledge or formal understanding of dependencies.                             |  | 0.00 |
|                  | 2) Minor understanding of dependencies.                                              |  | 0.33 |
|                  | 3) Critical dependencies are known.                                                  |  | 0.67 |
|                  | 4) The entire map of dependencies is depicted.                                       |  | 1.00 |
| <b>Metric</b>    | <b>S2.1.3 - Autonomy capacity</b>                                                    |  |      |
| Source           | -                                                                                    |  |      |
| Answer type      | Single choice                                                                        |  |      |
| Question         | Do infrastructures that are dependent on other services have any degree of autonomy? |  |      |
|                  | 1) No                                                                                |  | 0.00 |
|                  | 2) Yes, but for short-term service disruptions                                       |  | 0.50 |
|                  | 3) Yes, including above-average service disruptions                                  |  | 1.00 |

| Criteria      | S2.2 - Redundancies                                          |      |
|---------------|--------------------------------------------------------------|------|
| <b>Metric</b> | <b>S2.2.1 - Type of redundancies in place</b>                |      |
| Source        | Adapted from RESCCUE RAF [28]                                |      |
| Answer type   | Multiple choice                                              |      |
| Question      | What type of redundancies are purposely in place?            |      |
|               | 1) None.                                                     | 0.00 |
|               | 2) Meshed network (relief sewers)                            | 0.14 |
|               | 3) Oversized sewers (onsite storage)                         | 0.14 |
|               | 4) Storm tanks                                               | 0.14 |
|               | 5) Multi-purpose flooding areas                              | 0.14 |
|               | 6) Alternative flow pathways                                 | 0.14 |
|               | 7) Detention/Retention ponds                                 | 0.14 |
|               | 8) Other NBS                                                 | 0.14 |
| <b>Metric</b> | <b>S2.2.2 - Redundancies communication</b>                   |      |
| Source        | -                                                            |      |
| Answer type   | Single choice                                                |      |
| Question      | Are redundancies communicated to the population?             |      |
|               | 1) No.                                                       | 0.00 |
|               | 2) Yes, passively.                                           | 0.50 |
|               | 3) Yes, actively.                                            | 1.00 |
| Objective     | S3 - System knowledge                                        |      |
| Criteria      | S3.1 - Monitoring, real-time control, and early warning      |      |
| <b>Metric</b> | <b>S3.1.1 - Monitoring equipment in place</b>                |      |
| Source        | -                                                            |      |
| Answer type   | Multiple choice                                              |      |
| Question      | What type of monitoring equipment is installed?              |      |
|               | 1) None.                                                     | 0.00 |
|               | 2) Rain gauges                                               | 0.13 |
|               | 3) Rainfall radar/satellite data                             | 0.13 |
|               | 4) Flow level in underground infrastructures                 | 0.13 |
|               | 5) Flow rate in underground infrastructures                  | 0.13 |
|               | 6) Flow quality in underground infrastructures/outfall       | 0.13 |
|               | 7) Flow level at the surface                                 | 0.13 |
|               | 8) Storm overflows                                           | 0.13 |
|               | 9) Other(s)                                                  | 0.13 |
| <b>Metric</b> | <b>S3.1.2 - Monitoring data treatment, usage and sharing</b> |      |
| Source        | -                                                            |      |
| Answer type   | Multiple choice                                              |      |
| Question      | How is monitoring data used?                                 |      |
|               | 1) No specific treatment                                     | 0.25 |
|               | 2) Real-time performance dashboard                           | 0.25 |
|               | 3) Early warning indicators                                  | 0.25 |
|               | 4) Real-time control of equipment                            | 0.25 |

|                 |                                                                                                                       |  |      |
|-----------------|-----------------------------------------------------------------------------------------------------------------------|--|------|
| <b>Metric</b>   | <b>S3.1.3 - Real-time control equipment in place</b>                                                                  |  |      |
| Source          | -                                                                                                                     |  |      |
| Answer type     | Single choice                                                                                                         |  |      |
| Question        | Is there real-time controlled equipment installed?                                                                    |  |      |
|                 | 1) No                                                                                                                 |  | 0.00 |
|                 | 2) Yes                                                                                                                |  | 1.00 |
| <b>Metric</b>   | <b>S3.1.4 - Early warning procedures</b>                                                                              |  |      |
| Source          | Adapted from RESCCUE RAF [28]                                                                                         |  |      |
| Answer type     | Single choice                                                                                                         |  |      |
| Question        | Are there forecasts and/or early warning procedures?                                                                  |  |      |
|                 | 1) No                                                                                                                 |  | 0.00 |
|                 | 2) Yes, with an internal early warning only                                                                           |  | 0.50 |
|                 | 3) Yes, internal and public early warning procedures exist                                                            |  | 1.00 |
| <b>Criteria</b> | <b>S3.2 - Human and financial resources</b>                                                                           |  |      |
| <b>Metric</b>   | <b>S3.2.1 - Human resources adequacy for service cover</b>                                                            |  |      |
| Source          | Adapted from RESCCUE RAF [28]                                                                                         |  |      |
| Answer type     | Single choice                                                                                                         |  |      |
| Question        | Does the service have adequate human resources?                                                                       |  |      |
|                 | 1) No                                                                                                                 |  | 0.00 |
|                 | 2) Yes, for normal conditions                                                                                         |  | 0.50 |
|                 | 3) Yes, for normal conditions and emergencies                                                                         |  | 1.00 |
| <b>Metric</b>   | <b>S3.2.2 - Financial plan and budget allocation</b>                                                                  |  |      |
| Source          | Adapted from RESCCUE RAF [28]                                                                                         |  |      |
| Answer type     | Single choice                                                                                                         |  |      |
| Question        | Does the service have a financial plan with a dedicated budget for resilience building/disaster risk reduction (DRR)? |  |      |
|                 | 1) There is no clear financial plan.                                                                                  |  | 0.00 |
|                 | 2) The financial plan indirectly includes resilience building/DRR, but budgets are not ring-fenced.                   |  | 0.50 |
|                 | 3) The financial plan directly considers resilience building/DRR, and budgets are ring-fenced.                        |  | 1.00 |
| <b>Metric</b>   | <b>S3.2.3 - Service material resources in case of failure</b>                                                         |  |      |
| Source          | -                                                                                                                     |  |      |
| Answer type     | Single choice                                                                                                         |  |      |
| Question        | Does the service have adequate material resources?                                                                    |  |      |
|                 | 1) No                                                                                                                 |  | 0.00 |
|                 | 2) Yes, for normal conditions                                                                                         |  | 0.50 |
|                 | 3) Yes, for normal conditions and emergencies                                                                         |  | 1.00 |
| <b>Criteria</b> | <b>S3.3 - Disturbing events</b>                                                                                       |  |      |
| <b>Metric</b>   | <b>S3.3.1 - Response protocol for disturbing events</b>                                                               |  |      |
| Source          | -                                                                                                                     |  |      |
| Answer type     | Single choice                                                                                                         |  |      |
| Question        | Does the service have a standard protocol for emergencies?                                                            |  |      |
|                 | 1) No formal/informal protocol exists.                                                                                |  | 0.00 |
|                 | 2) Protocol exists, but informally (based on past occurrences and available resources)                                |  | 0.33 |
|                 | 3) Protocol exists formally but is not integrated/aligned with a city-wide emergency plan                             |  | 0.67 |
|                 | 4) Protocol exists formally and is integrated/aligned with a city-wide emergency plan                                 |  | 1.00 |

|                 |                                                                                                          |  |      |
|-----------------|----------------------------------------------------------------------------------------------------------|--|------|
| <b>Metric</b>   | <b>S3.3.2 - Recording procedures for disturbing events</b>                                               |  |      |
| Source          | -                                                                                                        |  |      |
| Answer type     | Multiple choice                                                                                          |  |      |
| Question        | Are recording procedures implemented in the case of a disruptive event?                                  |  |      |
|                 | 1) No recording procedures are implemented.                                                              |  | 0.00 |
|                 | 2) Emergency/civil protection calls.                                                                     |  | 0.17 |
|                 | 3) Flood duration is measured/estimated.                                                                 |  | 0.17 |
|                 | 4) Flood hazardousness (e.g., depth) is measured/estimated.                                              |  | 0.17 |
|                 | 5) Flooded area is measured/estimated.                                                                   |  | 0.17 |
|                 | 6) Infrastructure failure is registered.                                                                 |  | 0.17 |
|                 | 7) Other(s)                                                                                              |  | 0.17 |
| <b>Metric</b>   | <b>S3.3.3 - Adaptation capacity after disturbing events</b>                                              |  |      |
| Source          | -                                                                                                        |  |      |
| Answer type     | Single choice                                                                                            |  |      |
| Question        | Does the service have cases of adaptation measures/strategies taken due to past disruptive events?       |  |      |
|                 | 1) No                                                                                                    |  | 0.00 |
|                 | 2) Yes                                                                                                   |  | 1.00 |
| <b>Metric</b>   | <b>S3.3.4 - Transformability capacity after disturbing events</b>                                        |  |      |
| Source          | -                                                                                                        |  |      |
| Answer type     | Single choice                                                                                            |  |      |
| Question        | Does the service have cases of transformational measures/strategies taken due to past disruptive events? |  |      |
|                 | 1) No                                                                                                    |  | 0.00 |
|                 | 2) Yes                                                                                                   |  | 1.00 |
| <b>Criteria</b> | <b>S3.4 - Climate change preparedness</b>                                                                |  |      |
| <b>Metric</b>   | <b>S3.4.1 - Commitment to CC mitigation (%GHG reduction)</b>                                             |  |      |
| Source          | Adapted from RESCCUE RAF [28]                                                                            |  |      |
| Answer type     | Single choice                                                                                            |  |      |
| Question        | Is the service committed to CC mitigation through the reduction of GHG emissions?                        |  |      |
|                 | 1) No commitment.                                                                                        |  | 0.00 |
|                 | 2) Yes, but the target is lower than 20% or is not defined.                                              |  | 0.33 |
|                 | 3) Yes, with a 20 - 49% reduction target.                                                                |  | 0.67 |
|                 | 4) Yes, with a minimum 50% reduction target.                                                             |  | 1.00 |
| <b>Metric</b>   | <b>S3.4.2 - Existence of local/downscaled CC scenarios</b>                                               |  |      |
| Source          | -                                                                                                        |  |      |
| Answer type     | Multiple choice                                                                                          |  |      |
| Question        | Which relevant climate variables/events are there agreed CC scenarios/local projections?                 |  |      |
|                 | 1) None.                                                                                                 |  | 0.00 |
|                 | 2) Sea level rise                                                                                        |  | 0.33 |
|                 | 3) Rainfall intensities                                                                                  |  | 0.33 |
|                 | 4) Storm surges or coastal overtopping                                                                   |  | 0.33 |
| <b>Metric</b>   | <b>S3.4.3 - Current performance with future conditions</b>                                               |  |      |
| Source          | -                                                                                                        |  |      |
| Answer type     | Single choice                                                                                            |  |      |
| Question        | Has the current system's performance been evaluated based on known CC scenarios?                         |  |      |
|                 | 1) No                                                                                                    |  | 0.00 |
|                 | 2) Yes, for the minor system                                                                             |  | 0.50 |
|                 | 3) Yes, for the minor and major systems                                                                  |  | 1.00 |

|                  |                                                                                                                |      |
|------------------|----------------------------------------------------------------------------------------------------------------|------|
| <b>Metric</b>    | <b>S3.4.4 - In place or planned CC adaptation measures</b>                                                     |      |
| Source           | Adapted from RESCCUE RAF [28]                                                                                  |      |
| Answer type      | Multiple choice                                                                                                |      |
| Question         | What type of measures has the service implemented/planned to address climate change mitigation and adaptation? |      |
|                  | 1) None.                                                                                                       | 0.00 |
|                  | 2) Stakeholder or public engagement or awareness                                                               | 0.11 |
|                  | 3) Strengthening relationships between (inter)dependent services                                               | 0.11 |
|                  | 4) Improvement of information collection and analysis                                                          | 0.11 |
|                  | 5) Development of emergency or contingency plans                                                               | 0.11 |
|                  | 6) Implementation/improvement of green infrastructure                                                          | 0.11 |
|                  | 7) Implementation/improvement of grey infrastructure                                                           | 0.11 |
|                  | 8) Power generation in drainage infrastructures (e.g., turbinating)                                            | 0.11 |
|                  | 9) Energy consumption reduction (service fleet, pumping station optimization, etc.)                            | 0.11 |
|                  | 10) Other(s)                                                                                                   | 0.11 |
| <b>Criteria</b>  | <b>S3.5 - Stormwater overflow management</b>                                                                   |      |
| <b>Metric</b>    | <b>S3.5.1 - Stormwater overflow control</b>                                                                    |      |
| Source           | -                                                                                                              |      |
| Answer type      | Single choice                                                                                                  |      |
| Question         | Are stormwater overflows controlled with adequate equipment?                                                   |      |
|                  | 1) No adequate equipment exists for stormwater overflow control.                                               | 0.00 |
|                  | 2) Stormwater overflows are partially controlled with adequate equipment.                                      | 0.50 |
|                  | 3) Stormwater overflows are globally controlled with adequate equipment.                                       | 1.00 |
| <b>Metric</b>    | <b>S3.5.2 - Stormwater overflow monitoring</b>                                                                 |      |
| Source           | -                                                                                                              |      |
| Answer type      | Single choice                                                                                                  |      |
| Question         | Are stormwater overflows monitored with adequate equipment?                                                    |      |
|                  | 1) No adequate equipment exists for stormwater overflow monitoring.                                            | 0.00 |
|                  | 2) Stormwater overflow frequency and/or volumes are partially monitored.                                       | 0.50 |
|                  | 3) Stormwater overflow frequency and/or volumes are globally monitored.                                        | 1.00 |
| <b>Metric</b>    | <b>S3.5.3 - Stormwater overflow discharge</b>                                                                  |      |
| Source           | -                                                                                                              |      |
| Answer type      | Single choice                                                                                                  |      |
| Question         | Are stormwater overflow outfalls identified?                                                                   |      |
|                  | 1) No.                                                                                                         | 0.00 |
|                  | 2) Yes, partially.                                                                                             | 0.50 |
|                  | 3) Yes, globally.                                                                                              | 1.00 |
| <b>Objective</b> | <b>S4 - Infrastructural knowledge</b>                                                                          |      |
| <b>Criteria</b>  | <b>S4.1 - Infrastructures' register</b>                                                                        |      |
| <b>Metric</b>    | <b>S4.1.1 - Infrastructures' register existence and completeness</b>                                           |      |
| Source           | -                                                                                                              |      |
| Answer type      | Single choice                                                                                                  |      |
| Question         | Are the infrastructures adequately identified and mapped?                                                      |      |
|                  | 1) No structured register of infrastructures exists.                                                           | 0.00 |
|                  | 2) Global infrastructures' register exists with low detailed level                                             | 0.33 |
|                  | 3) Detailed infrastructure' register exists for critical areas                                                 | 0.67 |
|                  | 4) Global and detailed infrastructure' register exists                                                         | 1.00 |

|                 |                                                                 |      |
|-----------------|-----------------------------------------------------------------|------|
| <b>Metric</b>   | <b>S4.1.2 - Infrastructures' register update</b>                |      |
| Source          | -                                                               |      |
| Answer type     | Multiple choice                                                 |      |
| Question        | How frequently is the infrastructure register updated?          |      |
|                 | 1) No update routines/criteria                                  | 0.00 |
|                 | 2) Updated but with no defined frequency or other criteria.     | 0.33 |
|                 | 3) Updated periodically.                                        | 0.33 |
|                 | 4) Updated when infrastructures have any modifications.         | 0.33 |
| <b>Metric</b>   | <b>S4.1.3 - Infrastructures' register format</b>                |      |
| Source          | -                                                               |      |
| Answer type     | Single choice                                                   |      |
| Question        | In what format is the infrastructure register kept?             |      |
|                 | 1) Sketched-based register (CAD or similar)                     | 0.00 |
|                 | 2) GIS attribute-based (shapefiles or similar)                  | 1.00 |
| <b>Metric</b>   | <b>S4.1.4 - Infrastructures' register sharing</b>               |      |
| Source          | -                                                               |      |
| Answer type     | Multiple choice                                                 |      |
| Question        | What is the infrastructure's register-sharing policy?           |      |
|                 | 1) Detailed sharing with other municipal services               | 0.33 |
|                 | 2) Unrefined sharing with the public                            | 0.33 |
|                 | 3) Detailed sharing with the public                             | 0.33 |
| <b>Criteria</b> | <b>S4.2 - Inspection, maintenance and rehabilitation</b>        |      |
| <b>Metric</b>   | <b>S4.2.1 - Inspection procedures</b>                           |      |
| Source          | -                                                               |      |
| Answer type     | Multiple choice                                                 |      |
| Question        | How are inspection procedures implemented?                      |      |
|                 | 1) No inspection routines are implemented                       | 0.00 |
|                 | 2) Locally, when issues are reported                            | 0.50 |
|                 | 3) Periodic inspection of critical assets                       | 0.50 |
| <b>Metric</b>   | <b>S4.2.2 - Maintenance of inlet devices</b>                    |      |
| Source          | -                                                               |      |
| Answer type     | Single choice                                                   |      |
| Question        | Are there inlet devices' maintenance procedures?                |      |
|                 | 1) No maintenance procedures                                    | 0.00 |
|                 | 2) Maintenance is the responsibility of an external player      | 0.33 |
|                 | 3) Yes, with no established criteria (arbitrary)                | 0.67 |
|                 | 4) Yes, regularly and with established criteria                 | 1.00 |
| <b>Metric</b>   | <b>S4.2.3 - Maintenance of electromechanical equipment</b>      |      |
| Source          | -                                                               |      |
| Answer type     | Single choice                                                   |      |
| Question        | Are there electromechanical equipment maintenance procedures?   |      |
|                 | 1) No maintenance procedures                                    | 0.00 |
|                 | 2) Yes, with no established criteria (arbitrary or when needed) | 0.50 |
|                 | 3) Yes, regularly and with established criteria                 | 1.00 |

|                 |                                                                                                                                         |  |      |
|-----------------|-----------------------------------------------------------------------------------------------------------------------------------------|--|------|
| <b>Metric</b>   | <b>S4.2.4 - Rehabilitation of sewers/open channels</b>                                                                                  |  |      |
| Source          | Adapted from ERSAR [51]                                                                                                                 |  |      |
| Answer type     | Single choice                                                                                                                           |  |      |
| Question        | What is the average annual percentage of storm sewers/open channels with more than 10 years rehabilitated in the last 5 years?          |  |      |
|                 | 1) Less than 4.0                                                                                                                        |  | 0.00 |
|                 | 2) Between 4.0 and 20.0                                                                                                                 |  | 0.50 |
|                 | 3) More than 20.0                                                                                                                       |  | 1.00 |
| <b>Metric</b>   | <b>S4.2.5 - Coverage of expenditure with inspection, maintenance, and rehabilitation</b>                                                |  |      |
| Source          | Adapted from RESCCUE RAF [28]                                                                                                           |  |      |
| Answer type     | Single choice                                                                                                                           |  |      |
| Question        | What is the ratio between rehabilitation, operation, and infrastructure management expenditure and last year's annual operating budget? |  |      |
|                 | 1) Less than 0.9 or more than 1.2                                                                                                       |  | 0.00 |
|                 | 2) More than or equal to 0.9 and less than 1.0 or more than 1.1 and less than or equal to 1.2                                           |  | 0.50 |
|                 | 3) More than or equal to 1.0 and less than or equal to 1.1                                                                              |  | 1.00 |
| <b>Criteria</b> | <b>S4.3 - Internal risks understanding</b>                                                                                              |  |      |
| <b>Metric</b>   | <b>S4.3.1 - Known internal risks</b>                                                                                                    |  |      |
| Source          | Adapted from RESCCUE RAF [28]                                                                                                           |  |      |
| Answer type     | Multiple choice                                                                                                                         |  |      |
| Question        | Which of the following physical internal risks are currently assessed?                                                                  |  |      |
|                 | 1) None.                                                                                                                                |  | 0.00 |
|                 | 2) Structural conditions of sewers and manholes                                                                                         |  | 0.25 |
|                 | 3) Electromechanical equipment failure                                                                                                  |  | 0.25 |
|                 | 4) Inlets' capacity available                                                                                                           |  | 0.25 |
|                 | 5) Storm overflows frequency                                                                                                            |  | 0.25 |
| <b>Metric</b>   | <b>S4.3.2 - Mapping of internal risks</b>                                                                                               |  |      |
| Source          | Adapted from RESCCUE RAF [28]                                                                                                           |  |      |
| Answer type     | Single choice                                                                                                                           |  |      |
| Question        | Are the physical internal risks mapped?                                                                                                 |  |      |
|                 | 1) No                                                                                                                                   |  | 0.00 |
|                 | 2) Partially, not covering all the risks or all the infrastructure                                                                      |  | 0.50 |
|                 | 3) Yes (if suitable)                                                                                                                    |  | 1.00 |
| <b>Criteria</b> | <b>S4.4 - External risks understanding</b>                                                                                              |  |      |
| <b>Metric</b>   | <b>S4.4.1 - Known external risks</b>                                                                                                    |  |      |
| Source          | Adapted from RESCCUE RAF [28]                                                                                                           |  |      |
| Answer type     | Multiple choice                                                                                                                         |  |      |
| Question        | Which of the following physical external risks are currently assessed?                                                                  |  |      |
|                 | 1) None.                                                                                                                                |  | 0.00 |
|                 | 2) Electromechanical equipment's exposure to flooding                                                                                   |  | 0.20 |
|                 | 3) Equipment's exposure to tides                                                                                                        |  | 0.20 |
|                 | 4) Sewers' exposure to tides                                                                                                            |  | 0.20 |
|                 | 5) Inlet devices' exposure to clogging                                                                                                  |  | 0.20 |
|                 | 6) Sewers' exposure to silting up and deposition of sediments                                                                           |  | 0.20 |



---

|               |                                                                    |      |
|---------------|--------------------------------------------------------------------|------|
| <b>Metric</b> | <b>S4.4.2 - Mapping of external risks</b>                          |      |
| Source        | -                                                                  |      |
| Answer type   | Single choice                                                      |      |
| Question      | Are the physical external risks mapped?                            |      |
|               | 1) No                                                              | 0.00 |
|               | 2) Partially, not covering all the risks or all the infrastructure | 0.50 |
|               | 3) Yes (if suitable)                                               | 1.00 |

---

## References

28. Cardoso, M.A.; Brito, R.S.; Pereira, C.; Gonzalez, A.; Stevens, J.; Telhado, M.J. RAF Resilience Assessment Framework—A Tool to Support Cities' Action Planning. *Sustainability* **2020**, *12*, 2349. <https://doi.org/10.3390/su12062349>.
51. LNEC. *NOVA Guide for Assessment of the Quality of Water and Waste Services Provided to Users. 4th Generation Assessment System; ERSAR—The Water and Waste Services Regulation Authority*: Lisbon, Portugal, 2023; ISBN 978-989-8360-45-8.
