# Supplementary material for: Development of Resilience Framework and Respective Tool for Urban Stormwater Services
Source: MDPI journal article supplement (doi:10.3390/su16031316), 2024-02-04
Supplement: s1 [file s1]

Archive with 1 entries (1 files):
- sustainability-2824533-supplementary.pdf
